# Supplementary material for: Investigating Neolithic caprine husbandry in the Central Pyrenees: Insights from a multi-proxy study at Els Trocs cave (Bisaurri, Spain)
Source: PLoS One. 2021 Jan 6;16(1):e0244139. doi: 10.1371/journal.pone.0244139 (PMC7787385; doi:10.1371/journal.pone.0244139)
Supplement: S6 Table — (XLSX) [file pone.0244139.s007.xlsx]

## Sheet: Feuille 1
S6 Table. Sediment samples collected from Cova de Els Trocs for palaeoparasitological analysis
Sample nº	Phase	UE
17	T.I	127
18	T.I	127
19	T.I	127
20	T.I	127
21	T.I	127
31	T.I	20
32	T.I	20
34	T.I	20
35	T.I	20
36	T.I	20
38	T.I	20
39	T.I	20
40	T.I	20
16	T.II	10
28	T.II	10
29	T.II	14
30	T.II	14
33	T.II	10
37	T.II	14
41	T.II	14
42	T.II	14
43	T.II	10
44	T.II	10
45	T.II	14
46	T.II	14
1	T.III	1
2	T.III	1
3	T.III	1
5	T.III	1
7	T.III	1
8	T.III	1
9	T.III	1
11	T.III	120
12	T.III	120
14	T.III	120
22	T.III	120
24	T.III	1
25	T.III	1
26	T.III	1
27	T.III	1
47	T.III	1
48	T.III	1
49	T.III	1
50	T.III	1
